# Supplementary material for: Cannibalism, Kuru, and Mad Cows: Prion Disease As a “Choose-Your-Own-Experiment” Case Study to Simulate Scientific Inquiry in Large Lectures
Source: PLOS journal article supplement (doi:10.1371/journal.pbio.1002351), 2016-01-20
Supplement: S8 (10.1371/journal.pbio.1002351.s008) [file journal.pbio.1002351.s008]

## Student Opinion Survey

Here are a number of statements that may or may not describe your beliefs about learning biology. You are asked to rate each statement by selecting a number between 1 and 5 where the numbers mean the following:

1. Strongly Disagree
2. Disagree
3. Neutral
4. Agree
5. Strongly Agree

Choose one of the above five choices that **best expresses your feeling** about the statement. If you don't understand a statement, leave it blank. If you have no strong opinion, choose 3.

We are asking that you express your own beliefs. **Your answers will not affect your grade.** Your instructors will never see your individual answers, only whether you participated and the class results as a whole. This information will be very helpful to us in an effort to design more effective science courses.

1. \_\_\_\_\_ It is possible to explain biological ideas with everyday language.
2. \_\_\_\_\_ I enjoy figuring out answers to biological questions.
3. \_\_\_\_\_ Learning biology changes my ideas about how the natural world works.
4. \_\_\_\_\_ It is a valuable use of my time to study the fundamental experiments behind biological ideas.
5. \_\_\_\_\_ If I had plenty of time, I would take a biology class outside of my major requirements just for fun.
6. \_\_\_\_\_ There is usually only one correct approach to solving a biology problem.
7. \_\_\_\_\_ For me, biology is primarily about learning known facts as opposed to investigating the unknown.
8. \_\_\_\_\_ We use this statement to discard the survey of people who are not reading the questions. Please select agree (not strongly agree) for this question to preserve your answers.
9. \_\_\_\_\_ Most important scientific discoveries are the result of one very talented, intelligent, and/or lucky scientist working alone.
10. \_\_\_\_\_ It is very important for scientists to go to meetings, like conferences, to communicate their results to other scientists.

Please circle your answer to the following questions or fill in the blank:

11. Current year in college: \_\_\_\_\_

12. What is your gender? \_\_\_\_\_

13. What is your race/ethnicity (select the one with which you most identify)?

Caucasian (White)    Hispanic    Native American    African American

Asian    Pacific Islander    Other (please specify)

14. Currently, what is your level of interest in biology?

Very Low    Low    Moderate    High    Very High

15. What is your current major or most likely major: \_\_\_\_\_
