# Supplementary material for: Cannibalism, Kuru, and Mad Cows: Prion Disease As a “Choose-Your-Own-Experiment” Case Study to Simulate Scientific Inquiry in Large Lectures
Source: PLOS journal article supplement (doi:10.1371/journal.pbio.1002351), 2016-01-20
Supplement: S9 (10.1371/journal.pbio.1002351.s009) [file journal.pbio.1002351.s009]

**Exit Assessment for *Inexplicable Disease* Activity**      **NAME:** \_\_\_\_\_

Your feedback will help us understand which aspects of your experience in this activity are valuable to you and will help guide future changes to instruction. It is important that you know that **your responses will be anonymous**. Any data shared or published from this survey will be presented as aggregate numbers or anonymous comments and quotes. The instructor will, however, identify students who completed the survey, as part of the class assessment. The instructor will **not** obtain individual responses connected to student ID numbers. If you have any questions or concerns about the survey or confidentiality, please contact: \_\_\_\_\_

What please circle your **year in college**:

1<sup>st</sup>      2<sup>nd</sup>      3<sup>rd</sup>      4<sup>th</sup>      5<sup>th</sup> or more

What is your academic major? (if undecided, please indicate this and provide an area of interest)

Using the scale below, please rate your understanding of the following topics BEFORE and AFTER the *Inexplicable Disease* activity.

|                                                                   | No Understanding         | Little Understanding     | Some/ Moderate Understanding | Great Deal of Understanding |
|-------------------------------------------------------------------|--------------------------|--------------------------|------------------------------|-----------------------------|
| How new scientific knowledge is created and disseminated - BEFORE | <input type="checkbox"/> | <input type="checkbox"/> | <input type="checkbox"/>     | <input type="checkbox"/>    |
| How new scientific knowledge is created and disseminated - AFTER  | <input type="checkbox"/> | <input type="checkbox"/> | <input type="checkbox"/>     | <input type="checkbox"/>    |
| How a scientist evaluates data - BEFORE                           | <input type="checkbox"/> | <input type="checkbox"/> | <input type="checkbox"/>     | <input type="checkbox"/>    |
| How a scientist evaluates data - AFTER                            | <input type="checkbox"/> | <input type="checkbox"/> | <input type="checkbox"/>     | <input type="checkbox"/>    |
| How scientists share and communicate information - BEFORE         | <input type="checkbox"/> | <input type="checkbox"/> | <input type="checkbox"/>     | <input type="checkbox"/>    |
| How scientists share and communicate information - AFTER          | <input type="checkbox"/> | <input type="checkbox"/> | <input type="checkbox"/>     | <input type="checkbox"/>    |

Can you give any **specific examples** of how you feel that your understanding of scientists has changed?

Using the scale below, please indicate whether you agree or disagree with the following statements

|                                                                                  | Strongly Disagree        | Disagree                 | Agree                    | Strongly Agree           |
|----------------------------------------------------------------------------------|--------------------------|--------------------------|--------------------------|--------------------------|
| I enjoyed participating in this activity                                         | <input type="checkbox"/> | <input type="checkbox"/> | <input type="checkbox"/> | <input type="checkbox"/> |
| This activity helped me learn                                                    | <input type="checkbox"/> | <input type="checkbox"/> | <input type="checkbox"/> | <input type="checkbox"/> |
| This activity was busy-work; it was <u>not</u> helpful                           | <input type="checkbox"/> | <input type="checkbox"/> | <input type="checkbox"/> | <input type="checkbox"/> |
| I did <u>not</u> enjoy participating in this activity                            | <input type="checkbox"/> | <input type="checkbox"/> | <input type="checkbox"/> | <input type="checkbox"/> |
| The activity gave me a better understanding of the process of scientific inquiry | <input type="checkbox"/> | <input type="checkbox"/> | <input type="checkbox"/> | <input type="checkbox"/> |
| I think this activity should be used in future offerings of this course          | <input type="checkbox"/> | <input type="checkbox"/> | <input type="checkbox"/> | <input type="checkbox"/> |
| I think this activity should be used in other courses                            | <input type="checkbox"/> | <input type="checkbox"/> | <input type="checkbox"/> | <input type="checkbox"/> |
| This activity got me interested in learning about prions                         | <input type="checkbox"/> | <input type="checkbox"/> | <input type="checkbox"/> | <input type="checkbox"/> |

Do you think that this activity helped you to improve any SKILLS? (Examples of relevant skills include but are not limited to: the ability to work in groups, evaluate data, form a hypothesis, or think critically)

Using the scale below, please rate your knowledge of the following topics BEFORE and AFTER the activity.

|                                             | No Knowledge             | Little Knowledge         | Some/ Moderate Knowledge | Great Deal of Knowledge  |
|---------------------------------------------|--------------------------|--------------------------|--------------------------|--------------------------|
| Prions - BEFORE                             | <input type="checkbox"/> | <input type="checkbox"/> | <input type="checkbox"/> | <input type="checkbox"/> |
| Prions - AFTER                              | <input type="checkbox"/> | <input type="checkbox"/> | <input type="checkbox"/> | <input type="checkbox"/> |
| Causes of human disease - BEFORE            | <input type="checkbox"/> | <input type="checkbox"/> | <input type="checkbox"/> | <input type="checkbox"/> |
| Causes of human disease - AFTER             | <input type="checkbox"/> | <input type="checkbox"/> | <input type="checkbox"/> | <input type="checkbox"/> |
| Human immune responses - BEFORE             | <input type="checkbox"/> | <input type="checkbox"/> | <input type="checkbox"/> | <input type="checkbox"/> |
| Human immune responses - AFTER              | <input type="checkbox"/> | <input type="checkbox"/> | <input type="checkbox"/> | <input type="checkbox"/> |
| The role of an epidemiologist - BEFORE      | <input type="checkbox"/> | <input type="checkbox"/> | <input type="checkbox"/> | <input type="checkbox"/> |
| The role of an epidemiologist - AFTER       | <input type="checkbox"/> | <input type="checkbox"/> | <input type="checkbox"/> | <input type="checkbox"/> |
| Issues surrounding animal research - BEFORE | <input type="checkbox"/> | <input type="checkbox"/> | <input type="checkbox"/> | <input type="checkbox"/> |
| Issues surrounding animal research - AFTER  | <input type="checkbox"/> | <input type="checkbox"/> | <input type="checkbox"/> | <input type="checkbox"/> |

Other than about prions, what else did you learn? Was there anything that you were surprised to have learned?

What specifically did you enjoy or not enjoy about the activity?

Considering all aspects of the activity, would you **recommend** that this activity be used in college courses? **Why or why not?**

Any other comments?
